# Supplementary material
Source: PubMed Central journal article supplement (PMC3131421)

**A**

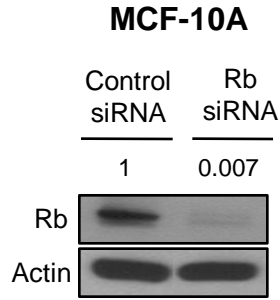

**B**

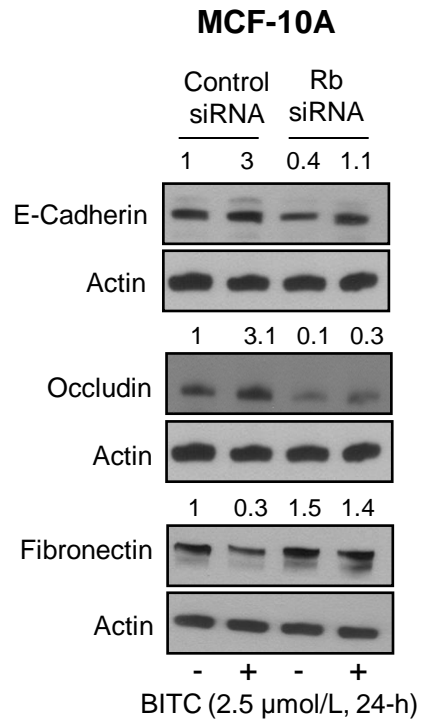

**C**

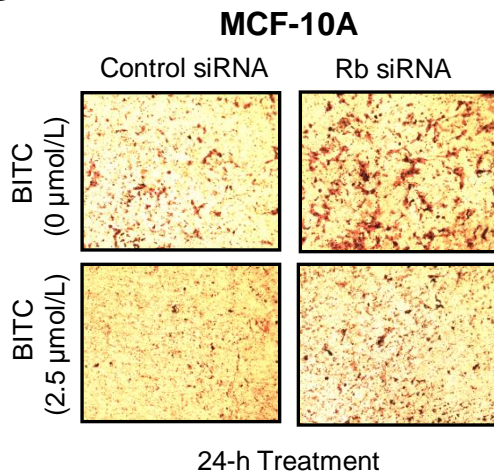

Supplement: NIHMS284514-supplement-Figure_S1.pdf [file NIHMS284514-supplement-Figure_S1.pdf]
